# Supplementary material for: Differential ROS‐Mediated Phosphorylation of Drp1 in Mitochondrial Fragmentation Induced by Distinct Cell Death Conditions in Cerebellar Granule Neurons
Source: Hindawi journal article supplement (doi:10.1155/2021/8832863), 2021-01-01

A)

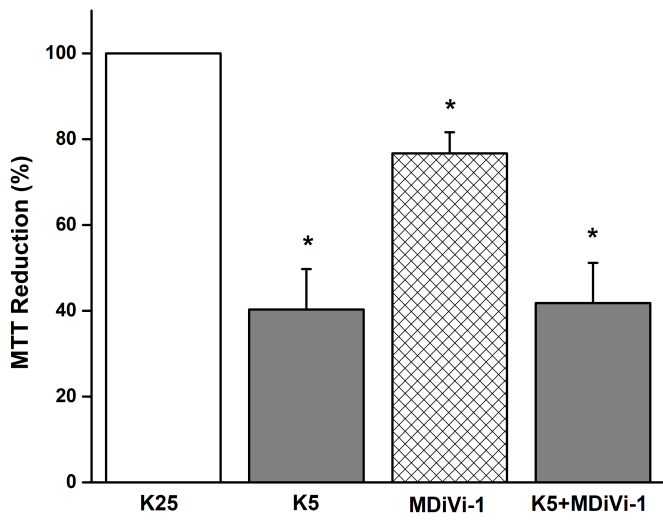

B)

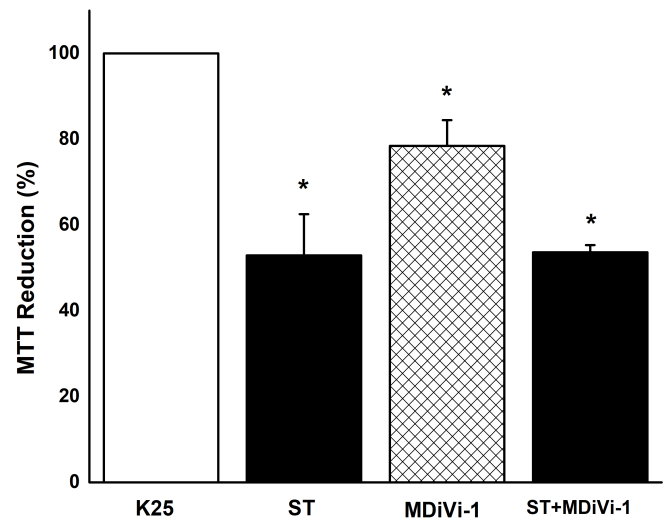

Supplement: f1 [file 8832863.f1.pdf]
